# Supplementary material for: Characterising recent drought events in the context of dry-season trends using state-of-the-art reanalysis and remote-sensing soil moisture products
Source: Copernicus journal article supplement (doi:10.5194/egusphere-2023-2499), 2023-11-02
Supplement: Supplementary file 1 [file egusphere-2023-2499-supplement.pdf]

## Supplementary Information

**Supplementary Table 1** Considered major drought events with pre-defined event regions and periods based on the cited references, serving as spatial and temporal bounds for the analysis. Events are ordered chronologically and grouped by seasonal and multi-year events. Note that the Europe 2022 event is only used to introduce the methodology for characterising the drought events, based on the near real-time products only.

| Region                             | Year      | Reference(s)                                       | Start time | End time   | Latitude extent | Longitude extent |
|------------------------------------|-----------|----------------------------------------------------|------------|------------|-----------------|------------------|
| <b>Seasonal, sub-annual events</b> |           |                                                    |            |            |                 |                  |
| Europe                             | 2003      | García-Herrera et al. (2010)                       | 10/06/2003 | 20/08/2003 | 42° N-53° N     | 0°-20° E         |
| SE-Europe                          | 2007      | Founda and Giannakopoulos (2009)                   | 01/05/2007 | 01/08/2007 | 36° N-52° N     | 20° E-45° E      |
| Western Russia                     | 2010      | Barriopedro et al. (2011), Hauser et al. (2016)    | 10/07/2010 | 20/08/2010 | 50° N-60° N     | 35° E-55° E      |
| Texas                              | 2011      | Rupp et al. (2012)                                 | 01/03/2011 | 31/08/2011 | 25° N-37° N     | 93° W-107° W     |
| Iberian Peninsula                  | 2011-2012 | Trigo et al. (2013)                                | 01/09/2011 | 31/08/2012 | 35.9° N-43.9° N | 10° W-3.5° E     |
| Great Plains                       | 2012      | Hoerling et al. (2014)                             | 01/04/2012 | 30/09/2012 | 31° N-46° N     | 82° W-114° W     |
| Europe                             | 2013      | Dong et al. (2014)                                 | 01/06/2013 | 31/08/2013 | 35° N-60° N     | 10° W-17° E      |
| Horn of Africa                     | 2013-2014 | Marthews et al. (2015)                             | 01/10/2013 | 30/06/2014 | 1.75° N-6.5° N  | 36° E-42.3° E    |
| Middle East                        | 2014      | Bergaoui et al. (2015)                             | 01/01/2014 | 28/02/2014 | 30.5° N-33.5° N | 34° E-36.5° E    |
| East Africa                        | 2015      | Funk et al. (2016)                                 | 01/06/2015 | 30/09/2015 | 7° N-14° N      | 36.5° E-40.5° E  |
| Western Canada                     | 2015      | Szeto et al. (2016)                                | 01/03/2015 | 30/09/2015 | 48° N-61° N     | 113° W-139° W    |
| Europe                             | 2015      | Dong et al. (2016)                                 | 01/06/2015 | 31/07/2015 | 45° N-55° N     | 0°-35° E         |
| Southern Africa                    | 2015-2016 | Yuan et al. (2018)                                 | 01/11/2015 | 30/04/2016 | 10° S-35° S     | 10° E-40° E      |
| Southern Europe                    | 2017      | Masante et al. (2018b), Kew et al. (2019)          | 01/06/2017 | 30/09/2017 | 36° N-48° N     | 8° E-24° E       |
| Europe                             | 2018      | Masante et al. (2018a), Masante and Vogt (2018)    | 01/06/2018 | 30/09/2018 | 45° N-68° N     | 10° W-35° E      |
| Europe                             | 2020      | Barbosa et al. (2020)                              | 01/03/2020 | 31/08/2020 | 40° N-68° N     | 10° W-35° E      |
| Europe                             | 2022      | Schumacher et al. (2022); Schumacher et al. (2023) | 01/06/2022 | 30/09/2022 | 36° N-58° N     | 10° W-30° E      |
| <b>Multi-year events</b>           |           |                                                    |            |            |                 |                  |
| South America                      | 2012-2016 | Martins et al. (2018)                              | 01/01/2012 | 31/12/2016 | 7° S-21° S      | 36° W-47° W      |
| Western USA                        | 2013-2014 | Swain et al. (2014), Wang and Schubert (2014)      | 01/01/2013 | 31/03/2014 | 32.3° N-42.9° N | 124.6° W-116° W  |

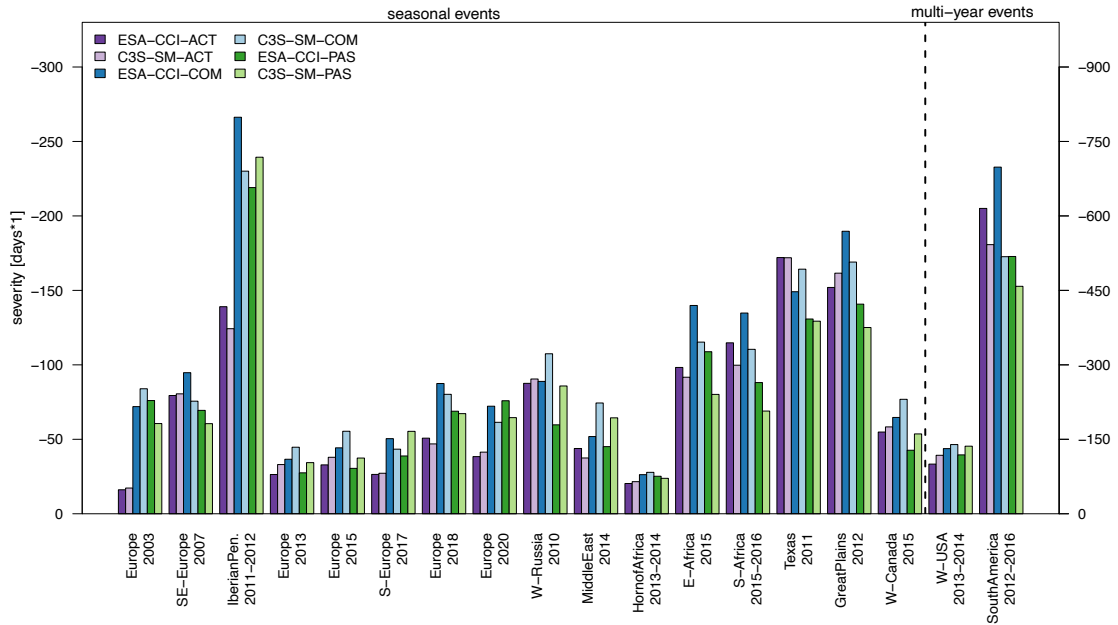

Supplementary Figure 1 As Fig. 6, but for the different remote sensing products only, including ACTIVE and PASSIVE products. Note that for the Europe 2003 event, both ESA-CCI-ACT and C3S-SM-ACT have reduced spatial and temporal coverage due to a sensor failure.

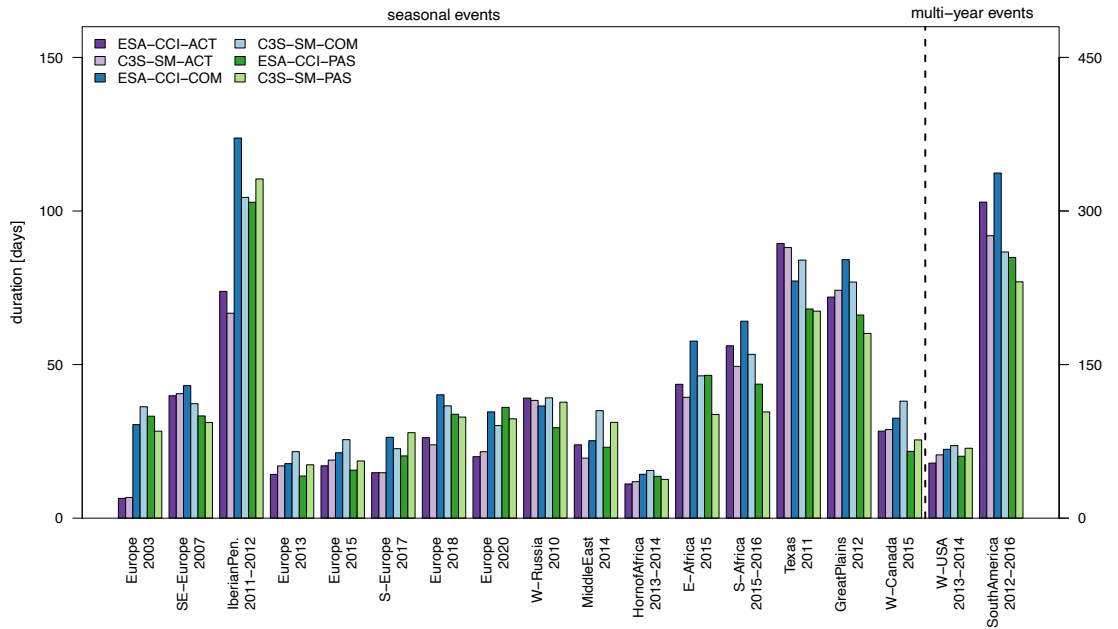

Supplementary Figure 2 As Fig. 7 but for the different remote sensing products only, including ACTIVE and PASSIVE products.

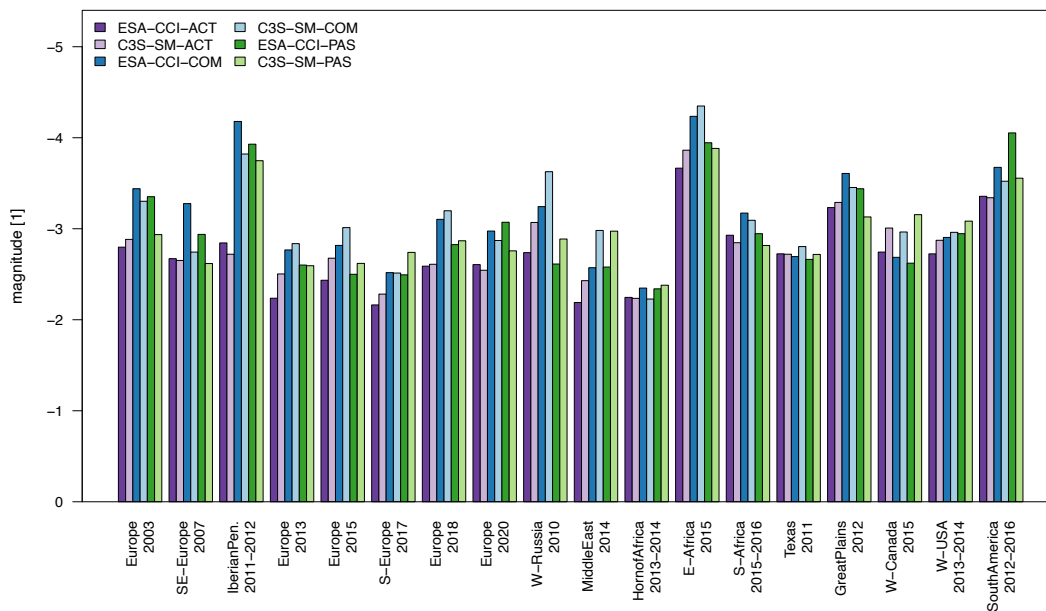

Supplementary Figure 3 As Fig. 8 but for the different remote sensing products only, including ACTIVE and PASSIVE products.

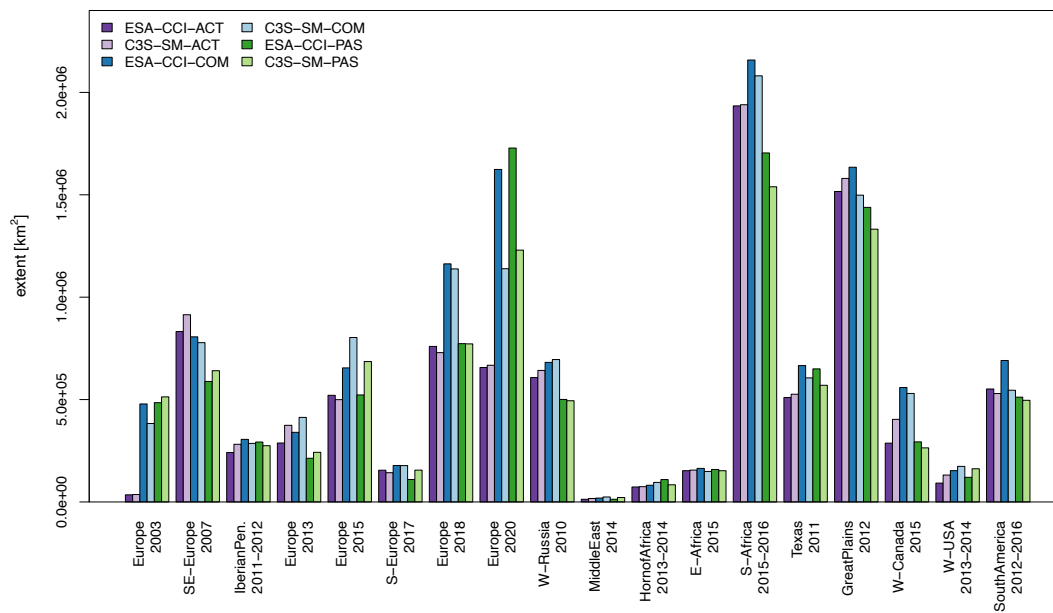

Supplementary Figure 4 As Fig. 9 but for the different remote sensing products only, including ACTIVE and PASSIVE products.

## References

- Barbosa, P., Masante, D., Arias Muñoz, C., Cammalleri, C., De Jager, A., Magni, D., Mazzeschi, M., McCormick, N., Naumann, G., Spinoni, J., and Vogt, J.: Drought in Europe – September 2020, Copernicus EMS – European Drought Observatory (EDO);, [https://edo.jrc.ec.europa.eu/documents/news/EDODroughtNews202009\\_Europe.pdf](https://edo.jrc.ec.europa.eu/documents/news/EDODroughtNews202009_Europe.pdf), 15-09-2023, 2020.
- Barriopedro, D., Fischer, E. M., Luterbacher, J., Trigo, R. M., and García-Herrera, R.: The Hot Summer of 2010: Redrawing the Temperature Record Map of Europe, *Science*, 332, 220-224, 10.1126/science.1201224, 2011.
- Bergaoui, K., Mitchell, D., Otto, F., Allen, M., Zaaboul, R., and McDonnell, R.: The Contribution of Human-Induced Climate Change to the Drought of 2014 in the Southern Levant Region [in “Explaining Extreme Events of 2014 from a Climate Perspective”], *Bulletin of the American Meteorological Society*, 96, S66-S70, 10.1175/bams-d-15-00129.1, 2015.
- Dong, B., Sutton, R., and Shaffrey, L.: The 2013 hot, dry summer in Western Europe [in “Explaining Extreme Events of 2013 from a Climate Perspective”], *Bulletin of the American Meteorological Society*, 95, S61-S66, 10.1175/1520-0477-95.9.S1.1, 2014.
- Dong, B., Sutton, R., Shaffrey, L., and Wilcox, L.: The 2015 European heat wave [in “Explaining Extreme Events of 2015 from a Climate Perspective”], *Bulletin of the American Meteorological Society*, 97, S57-S62, 10.1175/BAMS-D-16-0140.1, 2016.
- Founda, D. and Giannakopoulos, C.: The exceptionally hot summer of 2007 in Athens, Greece - A typical summer in the future climate?, *Global Planet Change*, 67, 227-236, 10.1016/j.gloplacha.2009.03.013, 2009.
- Funk, C., Harrison, L., Shukla, S., Korecha, D., Magadzire, T., Husak, G., Galu, G., and Hoell, A.: Assessing the Contributions of Local and East Pacific Warming to the 2015 Droughts in Ethiopia and Southern Africa [in “Explaining Extreme Events of 2015 from a Climate Perspective”], *Bulletin of the American Meteorological Society*, 97, S75–S80, 10.1175/BAMS-D-16-0167.1, 2016.
- García-Herrera, R., Díaz, J., Trigo, R. M., Luterbacher, J., and Fischer, E. M.: A Review of the European Summer Heat Wave of 2003, *Critical Reviews in Environmental Science and Technology*, 40, 267-306, 10.1080/10643380802238137, 2010.
- Hauser, M., Orth, R., and Seneviratne, S. I.: Role of soil moisture versus recent climate change for the 2010 heat wave in western Russia, *Geophysical Research Letters*, 43, 2819-2826, 10.1002/2016gl068036, 2016.
- Hoerling, M., Eischeid, J., Kumar, A., Leung, R., Mariotti, A., Mo, K., Schubert, S., and Seager, R.: Causes and Predictability of the 2012 Great Plains Drought, *Bulletin of the American Meteorological Society*, 95, 269-282, 10.1175/Bams-D-13-00055.1, 2014.
- Kew, S. F., Philip, S. Y., Oldenborgh, G. J. v., Schrier, G. v. d., Otto, F. E. L., and Vautard, R.: The Exceptional Summer Heat Wave in Southern Europe 2017 [in “Explaining Extreme Events of 2017 from a Climate Perspective”], *Bulletin of the American Meteorological Society*, 100, S49–S53 10.1175/BAMS-D-18-0109.1, 2019.

Marthews, T. R., Otto, F. E. L., Mitchell, D., Dadson, S. J., and Jones, R. G.: The 2014 Drought in the Horn of Africa: Attribution of Meteorological Drivers [in “Explaining Extreme Events of 2014 from a Climate Perspective”], *Bulletin of the American Meteorological Society*, 96, S83-S88, 10.1175/BAMS-D-15-00115.1, 2015.

Martins, E. S. P. R., Coelho, C. A. S., Haarsma, R., Otto, F. E. L., King, A. D., Jan van Oldenborgh, G., Kew, S., Philip, S., Vasconcelos Júnior, F. C., and Cullen, H.: A Multimethod Attribution Analysis of the Prolonged Northeast Brazil Hydrometeorological Drought (2012–16) [in “Explaining Extreme Events of 2016 from a Climate Perspective”], *Bulletin of the American Meteorological Society*, 99, S65-S69, 10.1175/bams-d-17-0102.1, 2018.

Masante, D. and Vogt, J.: Drought in Central-Northern Europe - August 2018, Copernicus European Drought Observatory, [http://edo.jrc.ec.europa.eu/documents/news/EDODroughtNews201808\\_Central\\_North\\_Europe.pdf](http://edo.jrc.ec.europa.eu/documents/news/EDODroughtNews201808_Central_North_Europe.pdf), 15-09-2023, 2018.

Masante, D., Barbosa, P., and McCormick, N.: Drought in Central-Northern Europe - July 2018, Copernicus European Drought Observatory, [http://edo.jrc.ec.europa.eu/documents/news/EDODroughtNews201807\\_Central\\_North\\_Europe.pdf](http://edo.jrc.ec.europa.eu/documents/news/EDODroughtNews201807_Central_North_Europe.pdf), 15-09-2023, 2018a.

Masante, D., Vogt, J., McCormick, N., Cammalleri, C., Magni, D., and de Jager, A.: Severe drought in Italy – July 2017, Joint Research Centre, European Commission: European Drought Observatory (EDO), [https://edo.jrc.ec.europa.eu/documents/news/EDODroughtNews201707\\_Italy.pdf](https://edo.jrc.ec.europa.eu/documents/news/EDODroughtNews201707_Italy.pdf), 15-09-2023, 2018b.

Rupp, D. E., Mote, P. W., Massey, N., Rye, C. J., Jones, R., and Allen, M. R.: Did Human Influence on Climate Make the 2011 Texas Drought more Probable? [in: “Explaining Extreme Events of 2011 from a Climate Perspective”], *Bulletin of the American Meteorological Society*, 93, 1052-1054, 10.1175/bams-d-12-00021.1, 2012.

Schumacher, D. L., Zachariah, M., Otto, F., Barnes, C., Philip, S., Kew, S., Vahlberg, M., Singh, R., Heinrich, D., Arrighi, J., van Aalst, M., Hauser, M., Hirschi, M., Bessenbacher, V., Gudmundsson, L., Beaudoin, H. K., Rodell, M., Li, S., Yang, W., Vecchi, G. A., Harrington, L. J., Lehner, F., Balsamo, G., and Seneviratne, S. I.: Detecting the human fingerprint in the summer 2022 West-Central European soil drought, *EGU sphere*, 2023, 1-41, 10.5194/egusphere-2023-717, 2023.

Schumacher, D. L., Zachariah, M., Otto, F., Barnes, C., Philip, S., Kew, S., Vahlberg, M., Singh, R., Heinrich, D., Arrighi, J., Aalst, M. v., Thalheimer, L., Raju, E., Hauser, M., Hirschi, M., Gudmundsson, L., Beaudoin, H. K., Rodell, M., Li, S., Yang, W., Vecchi, G. A., Vautard, R., Harrington, L. J., and Seneviratne, S. I.: High temperatures exacerbated by climate change made 2022 Northern Hemisphere soil moisture droughts more likely, *World Weather Attribution*, <https://www.worldweatherattribution.org/wp-content/uploads/WCE-NH-drought-scientific-report.pdf>, 15-09-2023, 2022.

Swain, D. L., Tsiang, M., Haugen, M., Singh, D., Charland, A., Rajaratnam, B., and Diffenbaugh, N. S.: The extraordinary California drought of 2013/2014: Character, context, and the role of climate change, *Bull. Am. Meteorol. Soc.*, 95, S3-S7, 2014.

Szeto, K., Zhang, X., White, R. E., and Brimelow, J.: The 2015 Extreme Drought in Western Canada [in “Explaining Extreme Events of 2015 from a Climate Perspective”], *Bulletin of the American Meteorological Society*, 97, S42-S45, 10.1175/BAMS-ExplainingExtremeEvents2015.1, 2016.

Trigo, R. M., Añel, J. A., Barriopedro, D., García-Herrera, R., Gimeno, L., Nieto, R., Castillo, R., Allen, M. R., and Massey, N.: The Record Winter Drought of 2011–12 in the Iberian Peninsula [In: “Explaining Extreme Events of 2012 from a Climate Perspective”], *Bulletin of the American Meteorological Society*, 94, S41-S45, 10.1175/BAMS-D-13-00085.1, 2013.

Wang, H. and Schubert, S.: Causes of the Extreme Dry Conditions over California during Early 2013 [in “Explaining Extreme Events of 2013 from a Climate Perspective”], *Bulletin of the American Meteorological Society*, 95, S7-S11, 10.1175/1520-0477-95.9.S1.1, 2014.

Yuan, X., Wang, L., and Wood, E. F.: Anthropogenic Intensification of Southern African Flash Droughts as Exemplified by the 2015/16 Season [in “Explaining Extreme Events of 2016 from a Climate Perspective”], *Bulletin of the American Meteorological Society*, 99, S86-S90, 10.1175/bams-d-17-0077.1, 2018.
